# Supplementary material
Source: Springer Nature journal article supplement (https://www.springermedizin.de/resource/supplementary/12885_2013_4162_MOESM3_ESM.pdf/9465598)

M  
O  
C

1,0  
0,8  
0,6  
0,4  
0,2  
0,0

,00

50,00

100,00

150,00

200,00

Months -

**CCI  $\geq 3$**

**CCI  $< 3$**

**p = 0.046**

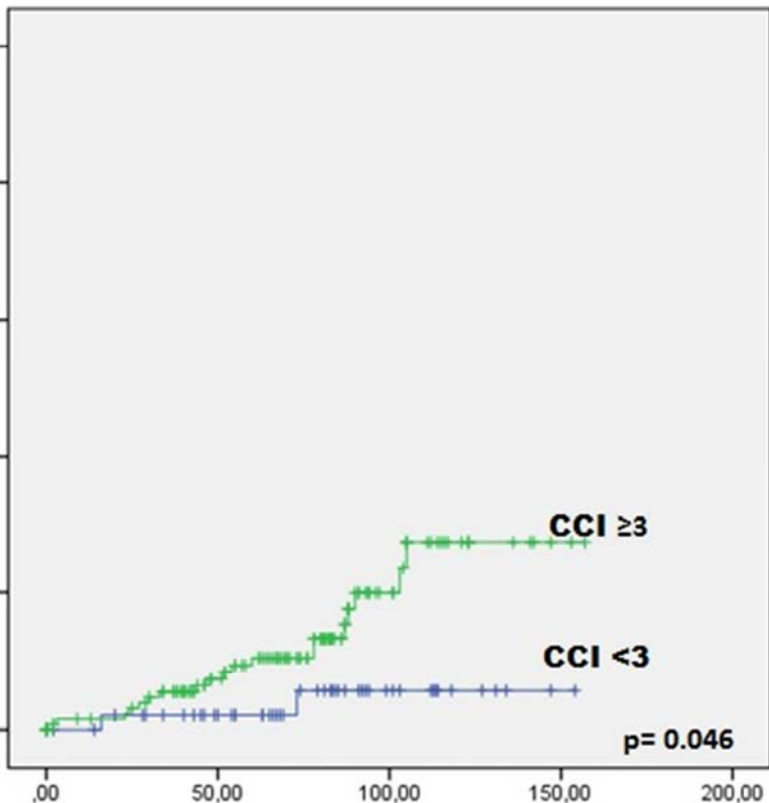

Supplement: MOESM3 [file 9465598]
